# Supplementary material for: Copper catalysts supported on porous aromatic frameworks for the hydrogenation of ethylene carbonate
Source: Research Square preprint supplement (doi:10.21203/rs.3.rs-6803584/v1), 2025-06-17
Supplement: Supplementary file 1 [file 2158fe2db0a762d04204b40a.docx]

**Supplementary Information for:**

**Copper catalysts supported on porous aromatic frameworks for the hydrogenation of ethylene carbonate**

Elizaveta Oskina a,b,*, Daria Makeeva a, Leonid Kulikov a, Anton Maximov a,b

a Department of Petroleum Chemistry and Organic Catalysis, Lomonosov Moscow State

University, Moscow, Russia 119991

b Topchiev Institute of Petrochemical Synthesis, RAS (TIPS RAS), Moscow, Russia 119991

*Corresponding author E-mail: oskina_ed

Postal address: Lomonosov Moscow State University, Faculty of Chemistry, Department of Petroleum Chemistry and Organic Catalysis, 1-3 Leninskiye Gory, Moscow, Russia, 119991

**Figure S1.** XPS C 1s spectra of the catalysts

**Figure S2.** EC hydrogenation on 30Cu-PAF-30-NH2 catalysts, reduced at different conditions.

*Reaction conditions*: EC/Cu=10:1 mol/mol, C(EC) = 0.15 M, 0.75 mL EC solution in ТHF, 4 h, 40 atm H2, 200℃.
